# Supplementary material for: Exploring the automaticity of language-perception interactions: Effects of attention and awareness
Source: PubMed Central journal article supplement (PMC4671057; doi:10.1038/srep17725), 2015-12-07
Supplement: srep17725-s1.pdf [file srep17725-s1.pdf]

## **Supplementary Information**

### **Exploring the automaticity of language-perception interactions: Effects of attention and awareness**

Jolien C. Francken, Erik L. Meijs, Peter Hagoort, Simon van Gaal, Floris P. de Lange,

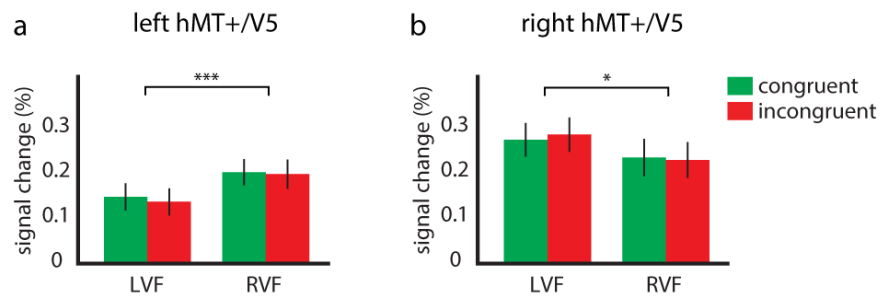

**Supplementary Figure S1. fMRI results.** (a) Within the lhMT+/V5 ROI the percentage signal change for the congruent (green) and incongruent (red) aware conditions is plotted for both the LVF (left) and RVF (right). (b) Congruency effects in the rhMT+/V5 ROI. Conventions as in (a).  $n = 23$ , error bars denote SEM. \*  $p < 0.05$ , \*\*\*  $p < 0.001$ .
